# Supplementary material for: Regulation of a Trehalose-Specific Facilitated Transporter (TRET) by Insulin and Adipokinetic Hormone in Rhodnius prolixus, a Vector of Chagas Disease
Source: PubMed Central journal article supplement (PMC7902789; doi:10.3389/fphys.2021.624165), 2021-02-10
Supplement: Data_Sheet_2.pdf [file Data_Sheet_2.pdf]

**Supplementary File S1:** The sequences employed for molecular phylogenetic analysis (Figure S5)

|               |   |                                                                              |
|---------------|---|------------------------------------------------------------------------------|
| Escherichia   | 1 | -----MMSKINQTDIDRLIELVGGKRNIAIVSHCITRLRFV-----                               |
| GLUT12_Homo   | 1 | -----MVFVENTEGPSLLNQ-----                                                    |
| GLUT10_Homo   | 1 | -----                                                                        |
| GLUT11_Homo   | 1 | -----                                                                        |
| GLUT2_Mus     | 1 | -----MSEDKIT-----                                                            |
| GLUT3_Homo    | 1 | -----                                                                        |
| GLUT4_Homo    | 1 | -----                                                                        |
| GLUT1_Mus     | 1 | -----                                                                        |
| GLUT9_Homo    | 1 | -----                                                                        |
| GLUT5_Homo    | 1 | -----                                                                        |
| GLUT7_Homo    | 1 | -----                                                                        |
| Halyomorpha   | 1 | -----MKDFGMWNGKELPRVYTSLPTGEGE-----                                          |
| Bemisia       | 1 | MESNDIYRMASRMLNNSVDRRTHRRLKPSGSIESLSEEELTAVYGA-----                          |
| Cimex         | 1 | -----                                                                        |
| Rhodnius      | 1 | -----MSQKERNMLLV-----                                                        |
| Cinara        | 1 | -----MDILRTLRLPSPSRLLHIRTRFYSTALSSHGQTKPRGDRRREYDSTGRENGLDPTGRPESSVQNGIPGRHA |
| Sipha         | 1 | -----MPISEDQVAELFGE-----                                                     |
| Melanaphis    | 1 | -----MAWIKRDRGDKAMQQTFTIDMPISEDQVAELYGE-----                                 |
| Acyrtosiphon  | 1 | -----MAWIRRGDKAMQQTFTIDMPISEDQVAELYGE-----                                   |
| Diuraphis     | 1 | -----MAWIRRGDKATQQTFTIDMPISEDQVAELYGE-----                                   |
| Myzus         | 1 | -----MAWIRRGDKATQQTFTIDMPISEDQVAELYGE-----                                   |
| Rhopalosiphum | 1 | -----MPISEDQVAELYGE-----                                                     |
| Aphis         | 1 | -----MPISEDQVAELYGE-----                                                     |
| Athalia       | 1 | -----MSSSQKWPVCLMFSKSKERGILPRQ-----                                          |
| Cephus        | 1 | -----MSSQRRQMMQPWPLCLMFPFSKSKERTILPKY-----                                   |
| Megachile     | 1 | -----MERNILPRY-----                                                          |
| Bombus        | 1 | -----MLRQPRVSTPLEHNVLPKY-----                                                |
| Blattella     | 1 | -----MRIPQTEDSFSS-----                                                       |
| Cryptotermes  | 1 | -----VLWSVLLIVVRVYINKIGPSEWLVS-----                                          |
| Nilaparvata   | 1 | -----MWYESEELKCNKCLSSSQESLLEEQLLEASGG-----                                   |
| Drosophila    | 1 | -----                                                                        |
| Culex         | 1 | -----MWIEIPECYEVLRNVFSK-----                                                 |
| Anopheles     | 1 | -----MEMGTKEENMRTA-----                                                      |
| Ceratitidis   | 1 | -----                                                                        |
| Lucilia       | 1 | -----MSGRDNRGSGHHQPLSNAMGKIKDRLSRDQPYQRVDLDEAATLNSNTATSLDTILPEDPFLFSS        |
| Musca         | 1 | -----MSGRDNRGSGHQPLGNAMGKIKDRLSREEQPYQRVDLDEGTLSTNTATSLDTILPE-DPFLFSP        |
| Stomoxys      | 1 | -----MSGRDNRGSGHQPLGNAMGKIKDRLSREEQPYQRVDLDEGTLSTNTATSLDTILPE-DPFLFPA        |
| GLUT          | 1 | -----                                                                        |
| GLUT8_Mus     | 1 | -----                                                                        |

|               |    |                                                                                                                                                                                                                                                                                             |
|---------------|----|---------------------------------------------------------------------------------------------------------------------------------------------------------------------------------------------------------------------------------------------------------------------------------------------|
| Escherichia   | 37 | -----LNQPANARPKKEI-----EQLP <sup>M</sup> VKGC <sup>F</sup> INAGQFQV <sup>L</sup> GTNVGDYYQALIASTGQAQ                                                                                                                                                                                        |
| GLUT12_Homo   | 16 | -----KGTAVETEG <sup>S</sup> GSRRHPPWARG-----                                                                                                                                                                                                                                                |
| GLUT10_Homo   | 1  | -----MG-----                                                                                                                                                                                                                                                                                |
| GLUT11_Homo   | 1  | -----MEDELEPSLRPRTQIQGR <sup>I</sup> -----                                                                                                                                                                                                                                                  |
| GLUT2_Mus     | 8  | -----GTLAFTVFTAVL-----SSFQFGYD <sup>I</sup> GVINAPQEV <sup>I</sup> ISH                                                                                                                                                                                                                      |
| GLUT3_Homo    | 1  | -----MGTQKVTPA-----                                                                                                                                                                                                                                                                         |
| GLUT4_Homo    | 1  | -----M-----PSGFQQIGSE <sup>D</sup> GEPPQQRVTGT                                                                                                                                                                                                                                              |
| GLUT1_Mus     | 1  | -----MDPSSKVTGR-----                                                                                                                                                                                                                                                                        |
| GLUT9_Homo    | 1  | -----MARKQNRNS-----KELG <sup>L</sup> VPLTDDTSHAGPPGPR                                                                                                                                                                                                                                       |
| GLUT5_Homo    | 1  | -----MEQQDQSMKEGR-----                                                                                                                                                                                                                                                                      |
| GLUT7_Homo    | 1  | -----MENKEAGTPPPIPSREGR-----                                                                                                                                                                                                                                                                |
| Halyomorpha   | 26 | -----ESILIGVKS <sup>R</sup> DP-----P--S <sup>I</sup> ISSAT <sup>S</sup> SNASVAT <sup>T</sup> AST                                                                                                                                                                                            |
| Bemisia       | 47 | -----GARIHSSH <sup>R</sup> PP-----P--S <sup>A</sup> LSS <sup>T</sup> C <sup>S</sup> SS <sup>S</sup> TSVAT <sup>N</sup> GST-----VAL                                                                                                                                                          |
| Cimex         | 1  | -----                                                                                                                                                                                                                                                                                       |
| Rhodnius      | 12 | -----GGDLEPVK <sup>S</sup> KS-----LNDFGLE <sup>T</sup> TV <sup>T</sup> SNRQ                                                                                                                                                                                                                 |
| Cinara        | 72 | HHRP <sup>S</sup> GR <sup>T</sup> VRV <sup>H</sup> HR <sup>R</sup> PR-----PEQ <sup>S</sup> VFAST <sup>M</sup> SS <sup>N</sup> ASVDT <sup>T</sup> VGS-----TAAL                                                                                                                               |
| Sipha         | 15 | -----GARIH <sup>S</sup> VH <sup>H</sup> RSR-----PEQ <sup>S</sup> VFAST <sup>M</sup> SS <sup>S</sup> ASVDT <sup>T</sup> VGS-----TAAL                                                                                                                                                         |
| Melanaphis    | 36 | -----GARIH <sup>S</sup> VH <sup>H</sup> RSR-----PEQ <sup>S</sup> VFAST <sup>M</sup> SS <sup>N</sup> ASVDT <sup>T</sup> VGS-----TAAL                                                                                                                                                         |
| Acyrtosiphon  | 36 | -----GARIH <sup>S</sup> VH <sup>H</sup> RSK-----PEQ <sup>S</sup> VFAST <sup>M</sup> SS <sup>N</sup> ASVDT <sup>T</sup> VGS-----TAAL                                                                                                                                                         |
| Diuraphis     | 36 | -----GARIH <sup>S</sup> VH <sup>H</sup> RSR-----PEQ <sup>S</sup> VFAST <sup>M</sup> SS <sup>N</sup> ASVDT <sup>T</sup> VGS-----TAAL                                                                                                                                                         |
| Myzus         | 36 | -----GARIH <sup>S</sup> VH <sup>H</sup> RSR-----PEQ <sup>S</sup> VFAST <sup>M</sup> SS <sup>N</sup> ASVDT <sup>T</sup> VGS-----TAAL                                                                                                                                                         |
| Rhopalosiphum | 15 | -----GARIH <sup>S</sup> VH <sup>H</sup> RSR-----PEQ <sup>S</sup> VFAST <sup>M</sup> SS <sup>N</sup> ASVDT <sup>T</sup> VGS-----TAAL                                                                                                                                                         |
| Aphis         | 15 | -----GARIH <sup>S</sup> VH <sup>H</sup> RSK-----PEQ <sup>S</sup> VFAST <sup>M</sup> SS <sup>N</sup> ASVDT <sup>T</sup> VGS-----TAAL                                                                                                                                                         |
| Athalia       | 27 | -----YTRVPTISR <sup>S</sup> ET-----ANS <sup>N</sup> IVAD <sup>C</sup> AS <sup>N</sup> T <sup>T</sup> LAT <sup>I</sup> PS <sup>P</sup> F-----TSQL                                                                                                                                            |
| Cephus        | 32 | -----YTRVPSIAR <sup>S</sup> AT-----TSS <sup>L</sup> IVSD <sup>C</sup> AS <sup>N</sup> AT <sup>L</sup> V <sup>T</sup> NAS <sup>P</sup> F-----                                                                                                                                                |
| Megachile     | 10 | -----YTKVPSVAR <sup>S</sup> T-----TNS <sup>S</sup> INLDC <sup>S</sup> SNAT <sup>L</sup> AT <sup>N</sup> VSP <sup>F</sup> -----                                                                                                                                                              |
| Bombus        | 20 | -----YTRVPPVTR <sup>S</sup> VT-----NDS <sup>G</sup> INLDC <sup>S</sup> SN <sup>T</sup> IAT <sup>N</sup> AS <sup>P</sup> F-----                                                                                                                                                              |
| Blattella     | 13 | -----EDSLLGR <sup>R</sup> SR <sup>N</sup> R-----GTISAS <sup>P</sup> ST <sup>T</sup> TF <sup>T</sup> ESTD <sup>S</sup> T <sup>I</sup> -----                                                                                                                                                  |
| Cryptotermes  | 26 | -----QDSSVSGG <sup>A</sup> SEA-----SEVGT <sup>Y</sup> QND <sup>S</sup> FT <sup>S</sup> SESD <sup>L</sup> LGR-----H                                                                                                                                                                          |
| Nilaparvata   | 34 | -----VAKICYA <sup>H</sup> HR <sup>L</sup> P-----P--S <sup>A</sup> LSS <sup>V</sup> T <sup>S</sup> SAASVAT <sup>L</sup> T <sup>L</sup> -----R                                                                                                                                                |
| Drosophila    | 1  | -----MKILMRAD <sup>T</sup> HVS <sup>F</sup> SV <sup>P</sup> A-----                                                                                                                                                                                                                          |
| Culex         | 19 | -----FRRHS-----LTAA <sup>M</sup> VKLLMRAD <sup>T</sup> HVS <sup>F</sup> TV <sup>P</sup> A-----                                                                                                                                                                                              |
| Anopheles     | 14 | -----VPFVRQITEEGK-----PKLEVYR <sup>P</sup> T <sup>T</sup> NI-----                                                                                                                                                                                                                           |
| Ceratitidis   | 1  | -----M-----KLLARAD <sup>T</sup> FM <sup>S</sup> FTVPEDEPK <sup>P</sup> T-----                                                                                                                                                                                                               |
| Lucilia       | 67 | HNRPTASQQ <sup>P</sup> IQQQ <sup>Q</sup> KQRRFETE <sup>I</sup> PLQFG <sup>P</sup> IIDADDINEP <sup>L</sup> PLVSAKATKI <sup>Q</sup> EPA <sup>L</sup> PL <sup>P</sup> PP-----PPSSQHS <sup>R</sup> RDH                                                                                          |
| Musca         | 65 | HNRPTA--PSTQQ <sup>Q</sup> RQ <sup>R</sup> F <sup>E</sup> A <sup>E</sup> F <sup>L</sup> QFG <sup>P</sup> ----IIEADDINEP <sup>L</sup> PL <sup>P</sup> INPKV <sup>K</sup> NTQ <sup>E</sup> PL <sup>L</sup> PL <sup>P</sup> PP-----PPSSH <sup>R</sup> RDQ <sup>H</sup>                         |
| Stomoxys      | 65 | QNRPPT <sup>T</sup> QLSP <sup>Q</sup> RQ <sup>R</sup> F <sup>E</sup> A <sup>E</sup> Y <sup>L</sup> QFG <sup>P</sup> ----IIEADDINEP <sup>L</sup> PL <sup>P</sup> VSQAK <sup>N</sup> TQ <sup>E</sup> PL <sup>L</sup> PL <sup>P</sup> PP-----PPA <sup>H</sup> HS <sup>R</sup> RDQ <sup>H</sup> |
| GLUT          | 1  | -----MQEPLLGAEG-----PDYDTFPEK <sup>P</sup> PPSPGDRAR <sup>V</sup> GT-----                                                                                                                                                                                                                   |
| GLUT8_Mus     | 1  | -----MS-----PEDQ <sup>E</sup> TQ <sup>L</sup> LR <sup>P</sup> PEART <sup>P</sup> GR-----                                                                                                                                                                                                    |

Escherichia 88 VDKEQVKKAAARQNMKWHEQLISHFAEIFFPLLPALISGGLILGFRNVIGDLPMSNG-----QTLAQMPYPSLQTIY----

GLUT12\_Homo 36 -----

GLUT10\_Homo 3 -----

GLUT11\_Homo 20 -----

GLUT2\_Mus 42 -----

GLUT3\_Homo 10 -----

GLUT4\_Homo 24 -----

GLUT1\_Mus 12 -----

GLUT9\_Homo 32 -----

GLUT5\_Homo 13 -----

GLUT7\_Homo 19 -----

Halyomorpha 58 -----SALLGVKVKKYLKSSKQDKLSQ-----KELNILLASQ-----

Bemisia 82 LHSSQRKKSNNKYNVHKYN-----LYNKGIKMTSGAQ-----KELNLLLAPTVP-----

Cimex 1 -----

Rhodnius 39 -----

Cinara 115 IHSAAKIKKKKYAFLRQGNQQT-----A---CSNGYTTGRHI---GSMIHSQ-----KEKNLLLATPNVP-----

Sipha 53 IHSAAKVKKKKYAFLRQGNNGH-----QQ---VASNGYITGRHCRGDSGVLFQ-----KERNIRLSAPTVP-----

Melanaphis 74 IHSAAKVKKKKYAFLRQGHSGGTAQOSASA---AANNGYVTGRHC--RDAAIHSQ-----KELNIRLATPTVP-----

Acyrtosiphon 74 IHSAAKVKKKKYAFLRQGNSSG-AQOSASA---SGNNGYLTGRHC--RDAAIHSQ-----KELNIRLATPTVP-----

Diuraphis 74 IHSAAKVKKKKYAFLRQGHSGG-AQOSASA---SSNNGFLTGRHC--RDAAIHSQ-----KELNIRLATPTVP-----

Myzus 74 IHSAAKVKKKKYAFLRQGNSSG-TQLSASA---SSNNGFLTGRHC--RDAAIHSQ-----KELNIRLATPTVP-----

Rhopalosiphum 53 IHSAAKVKKKKYAFLRQGHSGS-AQHSASA---AANNGYVTGRHC--RDAAIHSQ-----KELNIRLATPTVP-----

Aphis 53 IHSAAKVKKKKYAFLRQGHGG-AQOSASA---ASNNGYLTGRHC--RDAAIHSQ-----KELNIRLATPTVP-----

Athalia 65 TLSNDKKSPEVTEYPEPAH-----YYADNLLNNQNL--KKAKIYNE-----

Cephus 66 -NSQITLITDRKGSYPNGSNAASH-----YYAENLRNNHQSGLKGSIYNM-----

Megachile 44 -NSQALIAEKKALPPGNVADASTNH-----YYAQNLRNNHQKALNGSRVYDP-----LDKGIDHDYKQLDP----

Bombus 54 -NSQALIAEKKVILSGSVTASSNH-----YYAQNLRNNHQKTLGSHMYDP-----LDKGIDHDYKQLDP----

Blattella 45 -----VNIHKYHQYNQCRHNMSVSAQ-----KELNILIATPQVP-----

Cryptotermes 61 RNRTTISASSSTSTFITGSGSSI-----VNIHKHHDYKCHDRRMSVTQ-----KELNLLITAPQVPELSTG

Nilaparvata 67 TDKHTAAATLLTNKLL-----VNVHKHKLYNKATAKPNM-----KELNLLIASPTV-----

Drosophila 18 -----DGLKAN-----

Culex 46 -----

Anopheles 39 -----

Ceratitidis 24 -----

Lucilia 141 HTRSVVSI PSEDLQRSKQSLKGSRVSEFKRRANDSDEDSFEEKRSQFQQKAVSVDHKGILKDLRTILANDNRRQFQAK

Musca 134 TRSVVSTEDLQRSKSSLKGSRVSEFKRGG--DESEDDSFEEERTGFQQKAVSSVDHRGILKDLKTLANDNRRQFQSK

Stomoxys 135 TRSVVSTEDLQRSRQSLKGSRVSEFKRAGANNESDEDNFEERTGFQKQKALSSADHKGILKDLKTLANDNRRQFQSK

GLUT 33 -----

GLUT8\_Mus 25 -----

Escherichia 158 --DFLWLIGEAIFFYLPVIGICWSAVKKMGGTPILGIVLGV--TLVSPQLMNAAYLLGQQLPEVWDFGMFSIAKVGYQAQVI

GLUT12\_Homo 36 -----

GLUT10\_Homo 3 -----

GLUT11\_Homo 20 -----

GLUT2\_Mus 42 -----YRHVLGVPLDDRKAAINYDVN-----

GLUT3\_Homo 10 -----

GLUT4\_Homo 24 -----

GLUT1\_Mus 12 -----

GLUT9\_Homo 32 -----ALLECDHLRSGVPGRRRKD-----

GLUT5\_Homo 13 -----

GLUT7\_Homo 19 -----

Halyomorpha 90 -----PDMEAGKMEMEDPSVDKAPVYSYRG-----

Bemisia 127 -----EIKSESEKDPKDEANDGRLQNSHEATFETLN-----

Cimex 1 -----

Rhodnius 39 -----

Cinara 171 --NFID-----HILKKKQAIVVAQSSPKRLSSDDEDDDDDDDD-DDD-----VVPIK

Sipha 113 --NLFD-----QMIKKKQAL--DQVSAKRLSSDDDDDDDDDD-DDDEHEDDD--PRRK

Melanaphis 138 --NFID-----QILKKKQAT--EQVSAKRLSSDDDDDDDDDD-DDRDEDDVFLQDLK

Acyrtosiphon 137 --NFID-----QILKKKQAT--EQVSAKRLSSDDDDDDDDDD-DDRDEDDVFLQDLK

Diuraphis 137 --NFID-----QILKKKQAT--EQVAAKRLSS-----DDDDC-DDRDEDDVFLQDLK

Myzus 137 --NFID-----QILKKKQAT--EQVSAKRLSS-----DDDDC-DDRDEDDVFLQDLK

Rhopalosiphum 116 --NFID-----QILKKKQAT--EQVSAKRLSS-DDDDDDDDC-DDRDEDDVFLQDLK

Aphis 116 --NFID-----QILKKKQAT--EQVSAKRLSS-----DDDDC-DDRDEDDVFLQDLK

Athalia 105 -----HIQREDPNADHKQLDPLLDHGIQPD TAKMFHSQEFQVKMTSGPPFKSY

Cephus 111 -----EKATDADYKQLNPLCNKEHTES PDSKDPMDQDVKQKTADSVPLTSYQ

Megachile 92 -----LDKDHDRDYKQLDPLL---NDESPFVGVANERKMSSQDIKMKESA

Bombus 115 -----LLVGEPPYAGIELTKPMSQQNVKPTKDSVTVMQFQKEPKPSIM----

Blattella 80 -----ELSTGDEDL--KKVTAEQPSIQDVDFPATEIVTSDKVAKLNNEEPTKSQV

Cryptotermes 125 DDSLKN-----KVTVEEPSIQDNHVCEIKPQPQPQPEHRCSSKNNLGGSAAPQVQI--

Nilaparvata 113 -----GLDECRDKVPGQLTTTIVV I PYSEMERDDKHNIYEKQPQPQHPKQPPTAL

Drosophila 24 -----

Culex 46 -----EPPVAK-----

Anopheles 39 -----

Ceratitidis 24 -----

Lucilia 221 KHVSLDLKGTRYLKDLLKESSEEEFRKNRREFQGRKHQSLDPRVSFKLEKVLQGSSEDSDEENDVEQKRLIHRPKDIT

Musca 212 KHVSLDLKGTRYLKDLLKESSEEEFRKNRREFQGRKHQSLDPRVSFKLEKVLQGSSTDSDEENDVEHKRLIYRPKDIT

Stomoxys 215 KHVSLDLKGTRHLKDLLKDSSEEEFRKNRREFQGRKHQSLDPRVSFKLEKVLQGSSTDTDEENDVEQKHLIYRPKDIT

GLUT 33 -----

GLUT8\_Mus 25 -----

|               |     |                                                                                 |                   |
|---------------|-----|---------------------------------------------------------------------------------|-------------------|
| Escherichia   | 234 | PALLA-----                                                                      | -----GLALGVIETRLK |
| GLUT12_Homo   | 36  | -----                                                                           | -----             |
| GLUT10_Homo   | 3   | -----                                                                           | -----             |
| GLUT11_Homo   | 20  | -----                                                                           | -----             |
| GLUT2_Mus     | 63  | -----                                                                           | -----             |
| GLUT3_Homo    | 10  | -----                                                                           | -----             |
| GLUT4_Homo    | 24  | -----                                                                           | -----             |
| GLUT1_Mus     | 12  | -----                                                                           | -----             |
| GLUT9_Homo    | 52  | -----                                                                           | -----             |
| GLUT5_Homo    | 13  | -----                                                                           | -----             |
| GLUT7_Homo    | 19  | -----                                                                           | -----             |
| Halyomorpha   | 116 | -----                                                                           | -----             |
| Bemisia       | 160 | SSGII-----                                                                      | -----IKEKQDSSQSA- |
| Cimex         | 1   | -----                                                                           | -----             |
| Rhodnius      | 39  | -----                                                                           | -----             |
| Cinara        | 214 | NTTKI-----                                                                      | -----RTPQN-----   |
| Sipha         | 160 | TAVKI-----                                                                      | -----RTPQN-----   |
| Melanaphis    | 189 | SAAKI-----                                                                      | -----RTSQN-----   |
| Acyrtosiphon  | 187 | SAAKI-----                                                                      | -----RTPQN-----   |
| Diuraphis     | 182 | SAAKI-----                                                                      | -----RTPQN-----   |
| Myzus         | 183 | SAAKI-----                                                                      | -----RTPQN-----   |
| Rhopalosiphum | 165 | SAAKI-----                                                                      | -----RTSQN-----   |
| Aphis         | 163 | SAAKI-----                                                                      | -----RTPQN-----   |
| Athalia       | 154 | FQAEV-----                                                                      | -----APRRRC-----  |
| Cephus        | 160 | FQRET-----                                                                      | -----KPEKA-----   |
| Megachile     | 135 | STGKI-----                                                                      | -----RGTMKPLPDPKP |
| Bombus        | 159 | -----                                                                           | -----             |
| Blattella     | 127 | -----                                                                           | -----             |
| Cryptotermes  | 178 | -----                                                                           | -----             |
| Nilaparvata   | 162 | SLA-----                                                                        | -----             |
| Drosophila    | 24  | -----                                                                           | -----             |
| Culex         | 52  | -----                                                                           | -----             |
| Anopheles     | 39  | -----                                                                           | -----             |
| Ceratitidis   | 24  | -----                                                                           | -----             |
| Lucilia       | 301 | KPVIIDLKDLSESEEDYVSSRQHFFQQRSISTDSRKSIRFFEMDEMGSKKGENLRSAVFFVRQITEDGKPKLEVYRPTT |                   |
| Musca         | 292 | KPVVIDLKDLSESEEDYVSSRQHFFQQRSISTDSRKSIRFFEMDEMGRKKGENLRQAVFFVRQITEDGKPKLEVYRPTT |                   |
| Stomoxys      | 295 | KPLVIDLKDLSESEEDYDLRQHFFQQRSISTDSRKSIRFFEMDEIGRKKGDNLRQSVFFIRQITEDGKPKLEVYRPTT  |                   |
| GLUT          | 33  | -----                                                                           | -----L-----       |
| GLUT8_Mus     | 25  | -----                                                                           | -----             |

|               |     |                                                                                  |                                |
|---------------|-----|----------------------------------------------------------------------------------|--------------------------------|
| Escherichia   | 251 | ---RIVPDYLYLVVVPVCSLILAVFLAHLALIGPFGRMI-GDG-VAF-----                             | ---AVRHLMTGCSFAPIGGAL          |
| GLUT12_Homo   | 36  | ---CGMFTFLSSVTAAMVSG-LIVGYELCIISGALLQIK-----TLI-----                             | ---ALSCH---EQEM---VSSVIVIGALL  |
| GLUT10_Homo   | 3   | ---HSPPVLPPLCASVSLGGLTFGYELAVISSALLPLQLDFGLSCL                                   | ---EQEF---IVGSLILGALL          |
| GLUT11_Homo   | 20  | -----LLLTICAAGIGGTFQFGYNLSIINAPTLHIQ-EFTNETWQARTG---                             | ---EPLPDHLVLLMWSLIVSLYPLGGIF   |
| GLUT2_Mus     | 63  | -----GIDTPITVTPAYTTPAPWDEEETEGSAHI                                               | -----VTMLWSLSVSSFAVGGMI        |
| GLUT3_Homo    | 10  | -----LIFAITVATIIGS-FQFGYNTGVINAPKVIIE-EFINKITLTDKGN---                           | ---APPSEVLLTSLWSLSVAIFSVGGMI   |
| GLUT4_Homo    | 24  | -----LVLAVFSAVLGS-LQFGYNTGVINAPQKVIIE-QSYNETLWLRQGGPEGPSSIPPGLTTLTWSLSVAIFSVGGMI |                                |
| GLUT1_Mus     | 12  | -----LMLAVGGAVLGS-LQFGYNTGVINAPQKVIIE-EFYNETWLNHRYG---                           | ---EPIPTSTLTLTWSLSVAIFSVGGMI   |
| GLUT9_Homo    | 52  | ---WCSCLLVASLAGAFSSFLVGYNLSVVNAPTPYIK-AFYNESWERRHG---                            | ---RPIDPDTLTLTWSVTVSIFAIIGGLV  |
| GLUT5_Homo    | 13  | ---LTLVLALATLIAAFSSFQYGYNVAAVNSPALLMQ-QFYNETYYGRGT---                            | ---EFMEDFPLTLTWSVTVSMFPIGGFI   |
| GLUT7_Homo    | 19  | ---LQPTLLLATLSAAFSSAFQYGYNLSVVNTPHKVFK-SFYNETYFERHA---                           | ---TFMDGKMLMLLWSCTVSMFPIGGFL   |
| Halyomorpha   | 116 | ---SLVKQVLAALAVSLGS-MVVGFSASATAPALESMN-DED-SRI-----                              | ---HITDA---EASW---IGSLMPLSALF  |
| Bemisia       | 176 | ---SIIPQVLAALSLSVSLGS-LAVGFSSAYTSPALPSMT-DAT-SILYG---                            | ---KVSAAE---EMSW---IGSIMPLAALF |
| Cimex         | 1   | -----                                                                            | ---SW---IGSLMPLCALL            |
| Rhodnius      | 39  | ---AYIRQGLAAFSVSLGS-MVVGFSASAYTSPALPSMK-QPG-STL-----                             | ---HITDQ---QTSW---IASIMPLSALL  |
| Cinara        | 224 | ---TYVPOILASLTVSLGS-MVVGFSASAYTSPALPSMN-SPG-STL-----                             | ---SVSEE---EGSW---IGSLMPLAALI  |
| Sipha         | 170 | ---TYVPOVLAASLTVSLGS-MVVGFSASAYTSPALPSMN-SPG-SPL-----                            | ---SVSEE---EGSW---IGSLMPLAALI  |
| Melanaphis    | 199 | ---TYVPOILASLTVSLGS-MVVGFSASAYTSPALPSMN-RPG-SPL-----                             | ---TVSEE---EGSW---IGSLMPLAALI  |
| Acyrtosiphon  | 197 | ---TYVPOILASLTVSLGS-MVVGFSASAYTSPALPSMN-RPG-SPL-----                             | ---TVTEE---EGSW---IGSLMPLAALI  |
| Diuraphis     | 192 | ---TYVPOILASLTVSLGS-MVVGFSASAYTSPALPSMN-RPG-SPL-----                             | ---TVTEE---EGSW---IGSLMPLAALI  |
| Myzus         | 193 | ---TYVPOILASLTVSLGS-MVVGFSASAYTSPALPSMN-RPG-SPL-----                             | ---TVTEE---EGSW---IGSLMPLAALI  |
| Rhopalosiphum | 175 | ---TYVPOILASLTVSLGS-MVVGFSASAYTSPALPSMN-RPG-SPL-----                             | ---TVTEE---EGSW---IGSLMPLAALI  |
| Aphis         | 173 | ---TYVPOILASLTVSLGS-MVVGFSASAYTSPALPSMN-RPG-SPL-----                             | ---SVTEE---EGSW---IGSLMPLAALI  |
| Athalia       | 165 | ---HYIPQVLAALSLSVSLGS-MVVGFSASAYTSPALPSMK--NETSL-----                            | ---AMSAQ---AASW---VGGIMPLSALV  |
| Cephus        | 170 | ---GYGAQVLAALSLSVSLGS-MVVGFSASAYTSPALPSMY-NDTNTPL-----                           | ---HINAQ---IBSW---IGSIMPLSALF  |
| Megachile     | 152 | SIMHYASQVLAALSLSVSLGS-MVVGYSSTYTSPLVSMQ-NNATSF-----                              | ---EVTKE---IGMW---IGSIMPLSALF  |
| Bombus        | 159 | ---RYANQVLAALSLSVSLGS-MVVGYSSTYTSPLVSMR-DNATATF-----                             | ---EVTKE---TCMW---IGSIMPLSALF  |
| Blattella     | 127 | ---SWGPOVMAAASVSLGS-MVVGFTSAYTSPALVSMK-KAN-STV-----                              | ---QPDTQ---EASW---IGSLMPLSALI  |
| Cryptotermes  | 178 | ---HWGPOVMAAALSLSVSLGS-MVVGFSASAYTSPALVSMK-EPN-STV-----                          | ---QPDLQ---QKSW---IGSLMPLSALI  |
| Nilaparvata   | 165 | ---AIMPQVLAALSLSVSLGS-MVVGFSASAYTSPALPSMN--SNASSI-----                           | ---HVTPO---EBSW---IGSLMPLCALF  |
| Drosophila    | 24  | ---TTFQVLAALSLSVSLGS-LVVGFVSAAYTSPALVSMR-DRNITSF-----                            | ---EVTKD---AGSW---VGGIMPLAALA  |
| Culex         | 52  | ---CTFSQVLAALSLSVSLGS-MVVGFSASAYTSPALVSMK-DRNITSF-----                           | ---EVTDQ---SGSW---VGGIMPLAGLV  |
| Anopheles     | 39  | ---YIWTQVLAALSLSVSLGS-MVVGFSASAYTSPALVSMK-DRNITSF-----                           | ---EVTDQ---SGSW---VGGIMPLAGLA  |
| Ceratitidis   | 24  | ---GVRROVLAALSLSVSLGS-LVVGFSSAYTSPALVSMR-DRNITSF-----                            | ---EVTPO---EASW---VGGIMPLAGLA  |
| Lucilia       | 381 | NPIYIWTQVLAALSLSVSLGS-LVVGFSSAYTSPALVSMR-DRNITSF-----                            | ---EVTPO---DASW---VGGIMPLAGLA  |
| Musca         | 372 | NPIFIWTQVLAALSLSVSLGS-LVVGFSSAYTSPALVSMR-DRNITSF-----                            | ---EVTPO---TASW---VGGIMPLAGLA  |
| Stomoxys      | 375 | NPIFIWTQVLAALSLSVSLGS-LVVGFSSAYTSPALVSMR-DRNITSF-----                            | ---EVTPO---TASW---VGGIMPLAGLA  |
| GLUT          | 34  | ---QNKRVFLATFAAVLGN-FSFGYALVYTSFVHPALE-RSLDPDL-----                              | ---HLTKS---QASW---FGSVFTLGAAA  |
| GLUT8_Mus     | 25  | -----RVFLASFAAALGP-LISGFALGYSSPALPSLR-RTAPPAL-----                               | ---RLGDN---AASW---FGAVVTLGAAA  |



Escherichia 463 RKYRLGLTDDFDLVTQAKSRGRIITIDMVFNH---TSQHAWFREALNKESPYRQFYIWRDGEPEPTPPNNWRSKFGGS  
 GLUT12\_Homo 187 YAFANV-HHGKYMFGVLIPIGLVQAIAIMYFLP---PSPR--E-LVMKGOEGAKSKVIGRLRL-SDTTEELTVIKSSL  
 GLUT10\_Homo 160 T-----PWGWRHMFVGWITAPAWLQSLSLFLPAGTDEIAT--H-----KDLIPLQGEAP  
 GLUT11\_Homo 185 LRELLGGFQAMPILLASCLVPGALQLASLPLIP---ESPR--YLLIDCGDTEACLAALRRLRG-SCDLAGELFELEER  
 GLUT2\_Mus 207 LSFILGNQDHWIILGLSAPVAILQCILLLFPCP---ESPR--YLYIKLEEEVRAKKSILKRLRGTE-DVTKDINEMKKEK  
 GLUT3\_Homo 174 LEFILGSEELWPIILGFTILPAILQSAAPFCP---ESPR--ELLINRKEENAKOILQRLRGTDQ-DVSDIQEMKDES  
 GLUT4\_Homo 192 LESLLGTASLWPIILGLITVLPAILQSLPLPFCP---ESPR--YLYITQNLLEGPAKSKLKRITGW-ADVSGVLAELKDEK  
 GLUT1\_Mus 176 LDSIMGNADLWPIILSVIFIPAILQCILLLPFCP---ESPR--ELLINRNEENRAKSVLKKLRG-TADVTRDLOEMKEEG  
 GLUT9\_Homo 221 LPELLGKESTWPIYLVGVIVVPAVQLLSLPPFP---DSPR--YLLIEKHNEARAVKAFQTFGLK-ADVSQVEVEVLAES  
 GLUT5\_Homo 182 LRNLLANVDGWPIILGLITGVPAALQLLPLPFP---ESPR--YLLIQKDEAAAKALQTLRGWDS-VDREVAEIRQED  
 GLUT7\_Homo 188 LQAILGNPAGWPIILALTCVPAILQLLTLPPFP---ESPR--YSLIQKGDPAARQALRRLRG-HTDMEAELEDMRAEA  
 Halyomorpha 270 T-----YLDWTHLAILGACIPPLPFFICTILIP---ETPT--W-EINKGKKEQAEASLOWLRGKANKVSEMSNIVKAH  
 Bemisia 332 A-----YLDWSMLAFAGALIPVPFLICMFFIP---ETPR--W-YIGRNKHKARKALQWLGRQONADISAEFDEIEKTN  
 Cimex 108 K-----YLDWSELALFALLPVPFFIIMFFIP---ETPS--W-YISKEKETRAKMLQWRGASATDIKKEYAELIKIR  
 Rhodnius 193 K-----YLDWSKLALFACILPVPFFIIMFFIP---ETPR--W-FIGKMEHAKKSLKWLRTGENADLNKEMSELQKST  
 Cinara 378 K-----YLNWQMLAILGACIPPLPFLICMFLIP---ETPQ--W-YISRNKSKKAKKALQWLGRKNADITQEFSETEKAN  
 Siphia 324 K-----YLNWQMLAILGACIPPLPFLVCMFLIP---ETPQ--W-YISRNKSKKAKKALQWLGRKNADVTQEFSETEKAN  
 Melanaphis 353 K-----YLNWQMLAILGACIPPLPFLVCMFLIP---ETPQ--W-YISRNKSKKAKKALQWLGRKNADVTQEFSETEKAN  
 Acyrthosiphon 351 K-----YLNWQMLAILGACIPPLPFLVCMFLIP---ETPQ--W-YISRNKSKKAKKALQWLGRKNADVTQEFSETEKAN  
 Diuraphis 346 K-----YLNWQMLAILGACIPPLPFLVCMFLIP---ETPQ--W-YISRNKSKKAKKALQWLGRKNADVTQEFSETEKAN  
 Myzus 347 K-----YLNWQMLAILGACIPPLPFLVCMFLIP---ETPQ--W-YISRNKSKKAKKALQWLGRKNADVTQEFSETEKAN  
 Rhopalosiphum 329 K-----YLNWQMLAILGACIPPLPFLVCMFLIP---ETPQ--W-YISRNKSKKAKKALQWLGRKNADVTQEFSETEKAN  
 Aphis 327 K-----YLNWQMLAILGACIPPLPFLVCMFLIP---ETPQ--W-YISRNKSKKAKKALQWLGRKNADVTQEFSETEKAN  
 Athalia 318 M-----YLNWSNLAILGAILPVPFFIIMFLIP---ETPR--W-YIANGNREARAKSLQWLGRKNTDVEETAATEKAH  
 Cephus 325 M-----YLNWSHLAILGATLPVPFFIIMFLIP---ETPR--W-FISKGTKKARQSLQWLGRKNSDISEELTAVEKSH  
 Megachile 310 M-----YLDWRNLAILGAILPVPFFIIMFLIP---ETPR--W-YISKGTKKARKALQWLGRKGTDTIDELTAVEKHL  
 Bombus 314 M-----YLDWRNLAILGAILPVPFFIIMFLIP---ETPR--W-YISKGTKKARKALQWLGRKGTDTIDELTAVEKHL  
 Blattella 281 K-----YLDWSMLAILGACIPVPFLICMFLIP---ETPR--W-FFSKNKDEAKKALQWLGRKNDISHELKEDENNN  
 Cryptotermes 332 K-----YLNWSMLAILGACIPVPFLVCMFLIP---ETPR--W-YFSKAKGKCAKSLQWLGRKNDADISQELKEDENIN  
 Nilaparvata 319 K-----YLDWSLAILGAILPVPFLICMFLIP---ETPR--W-FVEKNGKQARAKALQWLGRKNNTDVSYEFSETEKSN  
 Drosophila 179 S-----EMNWSMLAFLGAILPVPFLIIMFLIP---ETPR--W-FVNRGQERARAKALVWLRGKEADVPELKGIMRSQ  
 Culex 207 N-----YMDWSELALFATLPVPFLIIMFLIP---ETPR--W-YVSRGRDDRARKALQWLGRKADVPDELKGIKSH  
 Anopheles 194 K-----YLDWSGLAFLGAILPVPFLIIMFLIP---ETPR--W-YVSRNREDRARKALQWLGRKADVPDELKGIKSH  
 Ceratitis 179 T-----YMDWSLAILGAILPVPFLIIMFLIP---ETPR--W-FVSRGREDRARRALQWLGRQADVPDELKGLMRTQ  
 Lucilia 539 T-----YMDWSLAILGAILPVPFLIIMFLIP---ETPR--W-YVSRNREERARKALVWLRGKEADVPELKGIMRSQ  
 Musca 530 T-----YMDWSLAILGAILPVPFLIIMFLIP---ETPR--W-YVSRNREERARKALVWLRGKEADVPELKGIMRSQ  
 Stomoxys 533 T-----YMDWSLAILGAILPVPFLIIMFLIP---ETPR--W-YVSRNREERARKALVWLRGQADVPDELKGLMRSQ  
 GLUT 189 L-----LLPWRWLAAGEAPVIMITLISFMP---NSPR--E-LLSRGRDEBALRALAWLRGTDVVDVHWEFEQIQD--  
 GLUT8\_Mus 177 W-----VLEWRWLAFLGCVPEFLMLIMCYMP---ETPR--E-LLTQHQQBAMAALREFLWG-----SREGWEE

Escherichia 539 AWRWHAESQYYIHLFAPEQADLNWEN-PAVRAELKKVCFWADRQVGLRLDVTNLLISKDPRFPEDLGG-DGRFFYTDG  
 GLUT12\_Homo 258 ---KDEYQYSFWDLFRSK---DNMRTRI---MIGITLIVFVQITGQPNILFYAS-  
 GLUT10\_Homo 208 -KLGPRPRYSFLDLFRAR---DNMRGRT---TVGLGLVLFQQLGQPNVLCYAS-  
 GLUT11\_Homo 258 AACQGCRRRPW-ELFQHR---ALRR-QV---TSLVVLGS--AMELCNDSSVAYAS-  
 GLUT2\_Mus 280 -EEASTEQKVSIVLQFETDA---NYRQ-PI---LVAIDMLHMAQQFSGINGIFYYST-  
 GLUT3\_Homo 247 ARMSQ-EKQVTVELEFRVS---SYRQ-PI---IISIVLQLSQQLSGINAVFYST-  
 GLUT4\_Homo 265 RKLER-ERPLSLQLLGSR---THRQ-PL---IIAVVLQLSQQLSGINAVFYST-  
 GLUT1\_Mus 249 RQMMREKVT-IIELEFRSP---AYRQ-PI---LIAVVLQLSQQLSGINAVFYST-  
 GLUT9\_Homo 294 -RVQRSIRLVSVLELLR-A---PYVWQV---VTVIVTMACYQLCGINAVWFYTN-  
 GLUT5\_Homo 255 -EAEKAAGFISVVKLFRMR---SLRW-QL---LSIIVLMGGQQLSGINAVFYAD-  
 GLUT7\_Homo 261 -RAERAEGHLSVHLCAIR---SLRW-QL---LSIIVLMAGQQLSGINAVFYAD-  
 Halyomorpha 337 KEAYHEQNQNVLKELFS-K---RYYL-PE---VISIGLMFFQQLSGINAVIFYTV-  
 Bemisia 399 AESNKNEKTAGCSEIFA-K---MYRR-PL---LISIGLMFFQQLSGINAVIFYTV-  
 Cimex 175 ---KMDNETVSFKELFS-R---KYIW-PL---CISIGLMFFQQLSGINAVIFYTV-  
 Rhodnius 260 -ELFK-ENKSSIKELFN-K---KYLK-PE---AISMGLMFFQQLSGINAVIFYTV-  
 Cinara 445 -HVGKNEEMPGYLSLFS-K---MYSK-PL---LISMGLMFFQQLSGINAVIFYTV-  
 Siphia 391 -HVGKNEEMPGYLSLFS-K---MYSK-PL---LISMGLMFFQQLSGINAVIFYTV-  
 Melanaphis 420 -HMGNKNEEMPGYLSLFS-K---MYSK-PL---LISMGLMFFQQLSGINAVIFYTV-  
 Acyrthosiphon 418 -HMGNKNEEMPGYLSLFS-K---MYSK-PL---LISMGLMFFQQLSGINAVIFYTV-  
 Diuraphis 413 -HMGNKNEEMPGYLSLFS-K---MYSK-PL---LISMGLMFFQQLSGINAVIFYTV-  
 Myzus 414 -HMGNKNEEMPGYLSLFS-K---MYSK-PL---LISMGLMFFQQLSGINAVIFYTV-  
 Rhopalosiphum 396 -HMGNKNEEMPGYLSLFS-K---MYSK-PL---LISMGLMFFQQLSGINAVIFYTV-  
 Aphis 394 -HMGNKNEEMPGYLSLFS-K---MYSK-PL---LISMGLMFFQQLSGINAVIFYTV-  
 Athalia 385 AESERNVSRGALKELLK-K---AYVK-PL---LISIGLMFFQQLSGINAVIFYTV-  
 Cephus 392 VDSERNASQSACVELFK-G---NNLK-PL---LISIGLMFFQQLSGINAVIFYTV-  
 Megachile 377 VESERNVSQGAFFELFK-R---NHK-PL---LISIGLMFFQQLSGINAVIFYTV-  
 Bombus 381 TDSERNVSQGAFFQLFK-K---NHK-PL---FISIGLMFFQQLSGINAVIFYTV-  
 Blattella 348 KQMEKGSN--STFELFN-K---SNLR-PL---LISIGLMFFQQLSGINAVIFYTV-  
 Cryptotermes 399 NESLKSPPSGSSF-ELFN-K---SNLK-PL---LISIGLMFFQQLSGINAVIFYTV-  
 Nilaparvata 386 KDAEKENESAFKELFS-A---KYSR-PL---IISIGLMFFQQLSGINAVIFYTV-  
 Drosophila 246 ADADRQATQNTCELFLK-R---NNLK-PL---SISIGLMFFQQLSGINAVIFYTV-  
 Culex 274 QDAERHASQSAMLDLLK-K---TNLK-PL---LISIGLMFFQQLSGINAVIFYTV-  
 Anopheles 261 QDAERHASSAMLDLLN-K---ANLK-PL---LISIGLMFFQQLSGINAVIFYTV-  
 Ceratitis 246 AQADRHATGNQVLELLR-R---NNLK-PL---SISIGLMFFQQLSGINAVIFYTV-  
 Lucilia 606 ADADRQATKNQFMELLK-R---NNLK-PL---SISIGLMFFQQLSGINAVIFYTV-  
 Musca 597 ADDERQARQNQFMELLK-R---NNLK-PL---SISIGLMFFQQLSGINAVIFYTV-  
 Stomoxys 600 ADDDRQAKNNQFMELLK-R---NNLK-PL---SISIGLMFFQQLSGINAVIFYTV-  
 GLUT 254 -NVRQSSRSVWAEARA-P---HVCR-PI---TVALLMRLQLLGIPTIIVYVYVQ-  
 GLUT8\_Mus 235 PPGVAEHQGFQALRRR-P---GIYK-PL---ITIGSLMFFQQLSGINAVIFYAN-



|               |     |                           |                                    |
|---------------|-----|---------------------------|------------------------------------|
| Escherichia   | 712 | -----CNHDQ-----           | -----PRIVSRFGDEGEYRVPAKMLAM        |
| GLUT12_Homo   | 429 | RGETTSASLINA-----         | -----GLSHTEYQIVTDPGDVPAFLK---      |
| GLUT10_Homo   | 348 | -----LQDSSLPPIPRTNEDQREPI | -----LSTAKKTKPHPRSGDPSAPPRLALSSALP |
| GLUT11_Homo   | 368 | -----LQSS-----            | -----PPPLPARCHALLR-----            |
| GLUT2_Mus     | 388 | -----LLDK-----            | -----FP-----                       |
| GLUT3_Homo    | 355 | -----LKDN-----            | -----YNGMSLV-----                  |
| GLUT4_Homo    | 373 | -----LLER-----            | -----VPAMS-----                    |
| GLUT1_Mus     | 357 | -----LLER-----            | -----LP-----                       |
| GLUT9_Homo    | 404 | -----LQDH-----            | -----AP-----                       |
| GLUT5_Homo    | 365 | -----LQDT-----            | -----VS-----                       |
| GLUT7_Homo    | 371 | -----FQNR-----            | -----VPELS-----                    |
| Halyomorpha   | 446 | -----GKTN-----            | -----CYDLESYGC-----                |
| Bemisia       | 508 | -----AKER-----            | -----NIDVTAAG-----                 |
| Cimex         | 281 | -----LKDR-----            | -----GTDLTEFG-----                 |
| Rhodnius      | 367 | -----MKNS-----            | -----GTDMTQYG-----                 |
| Cinara        | 553 | -----YKKS-----            | -----GYDVSNYG-----                 |
| Sipha         | 499 | -----YKNS-----            | -----GADVSOYG-----                 |
| Melanaphis    | 528 | -----YKNS-----            | -----GYDVSQYG-----                 |
| Acyrtosiphon  | 526 | -----YKNS-----            | -----GYDVSQYG-----                 |
| Diuraphis     | 521 | -----YKNN-----            | -----GYDVSQYG-----                 |
| Myzus         | 522 | -----YKNN-----            | -----GYDVSQYG-----                 |
| Rhopalosiphum | 504 | -----YKNN-----            | -----GYDVSQYG-----                 |
| Aphis         | 502 | -----YKNN-----            | -----GYDVSQYG-----                 |
| Athalia       | 494 | -----LKES-----            | -----GTNVESYGC-----                |
| Cephus        | 501 | -----QKES-----            | -----GAHVASYG-----                 |
| Megachile     | 486 | -----VKEL-----            | -----GSDVSAYG-----                 |
| Bombus        | 490 | -----VKAT-----            | -----GVDVTAAG-----                 |
| Blattella     | 455 | -----LKDVT-----           | -----KADTSTYGC-----                |
| Cryptotermes  | 507 | -----LKDHT-----           | -----DTNVTPYGC-----                |
| Nilaparvata   | 495 | -----VKNV-----            | -----QIDTTEYGC-----                |
| Drosophila    | 355 | -----CKAH-----            | -----GPDVSHYG-----                 |
| Culex         | 383 | -----VKNN-----            | -----GGDVSHYG-----                 |
| Anopheles     | 370 | -----MKNN-----            | -----GPDVSEYG-----                 |
| Ceratitidis   | 355 | -----CKAS-----            | -----GMNTEVGC-----                 |
| Lucilia       | 715 | -----CKSS-----            | -----GIDVSNVGC-----                |
| Musca         | 706 | -----CKAS-----            | -----EMDVSNVGC-----                |
| Stomoxys      | 709 | -----CKAS-----            | -----DMDVSNVGC-----                |
| GLUT          | 362 | -----FGPRPLSPNSTA-----    | -----GLESESYGDLAQPLAAPAG-----      |
| GLUT8_Mus     | 343 | -----LTQSL-----           | -----PSNSSHVGLVPIAAEPVDVQVGL       |

|               |     |                                   |                                             |                 |
|---------------|-----|-----------------------------------|---------------------------------------------|-----------------|
| Escherichia   | 740 | VLHGMQGTPYLYQGEEIGMTNPHFTRITDYRDV | ESLNFMAELRNDGRDADELLAILASKSRDNSRTPMQWSNGDNA | GFIA            |
| GLUT12_Homo   | 462 | -----WL-----                      | -----SLASLLVYV-----                         | -----AAFSI----- |
| GLUT10_Homo   | 410 | -----WT-----                      | -----ALLCLMVYV-----                         | -----SAFSF----- |
| GLUT11_Homo   | 374 | -----WTLYL-----                   | -----AMACIFAFI-----                         | -----LSFGI----- |
| GLUT2_Mus     | 394 | -----WMSYV-----                   | -----SMTAIFLFV-----                         | -----SFFEI----- |
| GLUT3_Homo    | 366 | -----WL-----                      | -----CTGAILVYV-----                         | -----AFFEI----- |
| GLUT4_Homo    | 382 | -----YV-----                      | -----SIVVAIFGV-----                         | -----AFFEI----- |
| GLUT1_Mus     | 363 | -----WMSYL-----                   | -----SIVVAIFGV-----                         | -----AFFEV----- |
| GLUT9_Homo    | 410 | -----WVPYL-----                   | -----SIVGILATL-----                         | -----ASFCS----- |
| GLUT5_Homo    | 371 | -----WMPYI-----                   | -----SIVCVISYV-----                         | -----IGHAL----- |
| GLUT7_Homo    | 380 | -----YL-----                      | -----GICVFAYI-----                          | -----AGHSI----- |
| Halyomorpha   | 458 | -----WV-----                      | -----PLPAFVIEI-----                         | -----FGFAI----- |
| Bemisia       | 520 | -----WI-----                      | -----PLASFVIYV-----                         | -----IGFSI----- |
| Cimex         | 293 | -----WI-----                      | -----PLVSEVLFV-----                         | -----IGFSI----- |
| Rhodnius      | 379 | -----WI-----                      | -----PLASSVIYV-----                         | -----IGFSI----- |
| Cinara        | 565 | -----WL-----                      | -----PLASFVBEI-----                         | -----IGFAI----- |
| Sipha         | 511 | -----WI-----                      | -----PLASFVBEI-----                         | -----IGFAI----- |
| Melanaphis    | 540 | -----WL-----                      | -----PLVSFVBEI-----                         | -----IGFAI----- |
| Acyrtosiphon  | 538 | -----WL-----                      | -----PLASFVBEI-----                         | -----IGFAI----- |
| Diuraphis     | 533 | -----WL-----                      | -----PLVSFVBEI-----                         | -----IGFAI----- |
| Myzus         | 534 | -----WL-----                      | -----PLASFVBEI-----                         | -----IGFAI----- |
| Rhopalosiphum | 516 | -----WL-----                      | -----PLVSFVBEI-----                         | -----IGFAI----- |
| Aphis         | 514 | -----WL-----                      | -----PLVSFVBEI-----                         | -----IGFAI----- |
| Athalia       | 506 | -----WL-----                      | -----PLASFVIYV-----                         | -----IGFSL----- |
| Cephus        | 513 | -----WL-----                      | -----PLASLVYV-----                          | -----IGFSL----- |
| Megachile     | 498 | -----WI-----                      | -----PLMSLIVYV-----                         | -----IGFSL----- |
| Bombus        | 502 | -----WI-----                      | -----PLMSLIVYV-----                         | -----IGFSL----- |
| Blattella     | 468 | -----WL-----                      | -----PLASFVIYV-----                         | -----IGFSF----- |
| Cryptotermes  | 520 | -----WL-----                      | -----PLVSFVIYV-----                         | -----IGFSF----- |
| Nilaparvata   | 508 | -----WV-----                      | -----PLGSFVYV-----                          | -----IGFSI----- |
| Drosophila    | 367 | -----WL-----                      | -----PLTCFVIYI-----                         | -----IGFSL----- |
| Culex         | 395 | -----WL-----                      | -----PLASFVIFV-----                         | -----IGFSL----- |
| Anopheles     | 382 | -----WL-----                      | -----PLAFAVYV-----                          | -----VGFSL----- |
| Ceratitidis   | 367 | -----WL-----                      | -----PLASFVIYV-----                         | -----VGFSL----- |
| Lucilia       | 727 | -----WL-----                      | -----PLASFVYI-----                          | -----IGFSL----- |
| Musca         | 718 | -----WL-----                      | -----PLASFVYV-----                          | -----IGFSL----- |
| Stomoxys      | 721 | -----WL-----                      | -----PLASFVYV-----                          | -----IGFSL----- |
| GLUT          | 393 | -----YLTLV-----                   | -----PLLATMLFI-----                         | -----MGYAV----- |
| GLUT8_Mus     | 371 | A-----WL-----                     | -----AVGSMCLFI-----                         | -----AGFAV----- |





**Supplementary File S2:** Columns are: VectorBase code—the official gene number in the RproC3 genome assembly; OV\_FC, OV\_UFC, FB\_FC, FB\_UFC show the readcount after normalization. Log2FoldChange:  $\log_2$  (fed condition/unfed condition); p-adj: pvalue after normalization (the smaller the p-adj, the more significant the difference). Transcripts highlights in red: trehalose transporters. FB\_FC, fat body in FC; FB\_UFC, fat body in UFC; OV\_FC, ovary in FC; OV\_UFC, ovary in UFC.

| Gene_id    | Suggested identity (by BLASTp)    | OV_F     | OV_UF    | log <sub>2</sub> FoldChange | padj     |
|------------|-----------------------------------|----------|----------|-----------------------------|----------|
| RPRC002241 | facilitated glucose transporter   | 1.484333 | 0.546686 | 1.441                       | 0.86967  |
| RPRC002688 | facilitated trehalose transporter | 146.231  | 174.1264 | -0.25189                    | 0.4134   |
| RPRC002833 | facilitated trehalose transporter | 1020.189 | 581.5957 | 0.81075                     | 4.84E-07 |
| RPRC004616 | facilitated glucose transporter   | 17.57322 | 11.17511 | 0.65309                     | 0.52979  |
| RPRC005613 | facilitated trehalose transporter | 2677.428 | 1658.913 | 0.69061                     | 0.03631  |
| RPRC010167 | facilitated glucose transporter   | 0        | 0        | NA                          | NA       |
| RPRC010168 | facilitated glucose transporter   | 0        | 0        | NA                          | NA       |
| RPRC011096 | facilitated glucose transporter   | 0        | 0        | NA                          | NA       |
| RPRC011385 | facilitated trehalose transporter | 77.03544 | 71.30437 | 0.11153                     | 0.87263  |
| RPRC011469 | ribonuclease P protein subunit    | 1499.828 | 1271.66  | 0.23808                     | 0.1685   |
| RPRC014535 | facilitated glucose transporter   | 308.1095 | 339.9465 | -0.14186                    | 0.6825   |
| RPRC015169 | facilitated trehalose transporter | 1.998917 | 12.06625 | -2.5937                     | 0.02998  |
| RPRC007957 | facilitated trehalose transporter | 1730.754 | 22.9776  | 6.235                       | 5.28E-43 |

| Gene_id    | Suggested identity (by BLASTp)    | FB_FC    | FB_UFC   | log <sub>2</sub> FoldChange | padj     |
|------------|-----------------------------------|----------|----------|-----------------------------|----------|
| RPRC002241 | facilitated glucose transporter   | 0        | 0        | NA                          | NA       |
| RPRC002688 | facilitated trehalose transporter | 9.556347 | 10.04905 | -0.072528                   | 1        |
| RPRC002833 | facilitated trehalose transporter | 6.674395 | 10.1139  | -0.59963                    | 0.77413  |
| RPRC004616 | facilitated glucose transporter   | 2.161835 | 3.248373 | -0.58746                    | 0.99291  |
| RPRC005613 | facilitated trehalose transporter | 3160.701 | 2329.008 | 0.44053                     | 0.84978  |
| RPRC010167 | facilitated glucose transporter   | 0        | 0        | NA                          | NA       |
| RPRC010168 | facilitated glucose transporter   | 0        | 0        | NA                          | NA       |
| RPRC011096 | facilitated glucose transporter   | 0        | 0        | NA                          | NA       |
| RPRC011385 | facilitated trehalose transporter | 2178.7   | 1839.659 | 0.24403                     | 0.86874  |
| RPRC011469 | ribonuclease P protein subunit    | 95.04148 | 63.0561  | 0.59192                     | 0.2874   |
| RPRC014535 | facilitated glucose transporter   | 429.4323 | 361.5216 | 0.24835                     | 0.77178  |
| RPRC015169 | facilitated trehalose transporter | 7.36546  | 0        | Inf                         | 0.02565  |
| RPRC007957 | facilitated trehalose transporter | 1801.396 | 268.3714 | 2.7468                      | 3.85E-05 |

**Supplementary File S3:** The sequences employed for phylogenetic analysis (Figure S4).

RPRC011385 1 GSGFSLAPIVLLWLTSEESEINMTLTQFSWLTSCPQIGFLLSVVPSGMLADRYGRKTVLI  
RPRC002688 1 ----WMAPYSIWLKGNHELOMTTSEFAWLTSIIIEVGAIIGCIPSAIYIADRWGRKSLIL  
RPRC015169 1 ----WLSPTYTIKLTGTENPI-LTTSMLATLLSITEIGEAGSIPSAIFSDFRGRKKSLL  
RPRC002833 1 -----  
Rhopr-TRET 1 -----  
RPRC005613 1 -----

RPRC011385 61 SAAPLSLLAWILVATTRDITVLFIVRLIQGITIAIAFTVAPVYVAEVSSPKVVRGLLGGQF  
RPRC002688 56 SSGPIYLAIWLLTAFTKNIIVFYIARILQGFLLAIADCVCSVYVAETSHPKRRGTLVGYF  
RPRC015169 55 LAGPLIIFSFLISLLTKNIIALLVMRILQGYVAATVEVVAPVYLAEISGAKIRGTVCGYY  
RPRC002833 1 -----  
Rhopr-TRET 1 -----  
RPRC005613 1 -----

RPRC011385 121 SLMLOVGTVVSIVAGLYLSYQTYIYVQMILSLMFLATFSFMPESPYYYFMVKRKEQAYSS  
RPRC002688 116 TVFWNLGILYVYTLGNYLNFDHYILTLTALPLLFCVFSFALMPESPYYYFMINEPARAESS  
RPRC015169 115 SVFWNLGIVVVFVSEYLSFDMYTLSTLVVPIIFCGTFFIFMPESPYYCLMKGETDGARSS  
RPRC002833 1 -----  
Rhopr-TRET 1 -----  
RPRC005613 1 -----

RPRC011385 181 YYWLS-GKQATEELLKIEENVQEDMKNKTGWVDLIARKCDRRALWLVLVFSFMRAATGMP  
RPRC002688 176 LKWL RHGKDIEVEYKQIEEAVRDDMKNSANWTELIATRSNRRALFIVQMCISRYMIGII  
RPRC015169 175 LQWLRHGEDIKYELEIEFAVREDMKYAGSWIDLIAATKEDRRALWIVLIGCMARYLIGIS  
RPRC002833 1 -----  
Rhopr-TRET 1 -----  
RPRC005613 1 -----

RPRC011385 240 SYAAYGTQIFAASS-KNIFPTDVLALIMVIVLLICTFLAALFSDTAGRRFLLILSSVGTI  
RPRC002688 236 TFTVYAEELSKVG-NMFTPSELSIFMGIVFALTAFISSFFSDSVGRKAMLLFSLAGCA  
RPRC015169 235 TFIAYAEDIFAKAGQNNLFTPNHLATFYALLFTVSSAVASFFSDTVGRRKLLIYSLIGTV  
RPRC002833 1 -----  
Rhopr-TRET 1 -----  
RPRC005613 1 -----

RPRC011385 299 ISNLAAGVYFYLELETSVN--LTIWILYLAVLGF CMSANTGTGNLQTVVQAEFFPSHTRG  
RPRC002688 295 VTNIIVAVYYLEHSRIDVLPYVWVLYLNLMGFCIFSNLTGLVQLMPTIKSEYFPTHIRS  
RPRC015169 295 ISNVIIAVYFCLLELTSLOITSHIWIWYLGSTVCCIFTNTGIGQLVPTIKAEFLPSHTRN  
RPRC002833 1 -----  
Rhopr-TRET 1 -----MSQKE---RNMLLVGGDLEPVKSK-  
RPRC005613 1 -----MRQT-

RPRC011385 357 KGGAITGITSALSTFLVVKLYQPLIDSVGIYMNFFFYAVSIA-VSLFLIHIYLPESAGKT  
RPRC002688 355 KGSAITSLTSAICIFIQLRLYTSINESIGIYMNFIIFAVFAI-ISIFLVVYFYLTESAGYL  
RPRC015169 355 RGSALTNAIASLAIFVQLFLFPMIAAYIGMYFNFITFAAAIKLVTAPPLLHLHPNKRCYL  
RPRC002833 1 -----FTVNL  
Rhopr-TRET 22 -----KSLNDFGLE---TTVTSN-----RQA-YIRQGLAAFSVSL  
RPRC005613 5 -----VGISQA---TLVSDG-----TKAYKVPQYIAALIVTI

RPRC011385 416 LAEV--NSLVKVEKSTLWLTSDQSEIKMTDKDFSWITATIELGILAFVIPAGILADRYGR  
RPRC002688 414 SVLMVGTCTFVWMAFYATSFTSSNGEIHMSHSLFAWLTSTVGI GEVISSLPSGILADMGR  
RPRC015169 415 CVMTASFVFNWLSPTYTIKLTSGESPVL-TPTILATLISVIEIGEAVTCIPVAIFSDFRGR  
RPRC002833 6 LYVGVGCVMAWTSPTVPKL----SKFITHEEASWIGSLYSLGATFGPIITYLGLDNIGR  
Rhopr-TRET 53 GSMVVGFSAYTSPALES MKQPGSTLHITEQQTSWIASLMPLSALLGGIIGGALVETLGR  
RPRC005613 34 GGLAMGTILGWTSPTELPLKAGQYGFVNNSEFPWIGSLMSIGAIFGAAFTGTITDKIGR

RPRC011385 474 KRVLLSAAPLCFLSWILATLTRDIVLVYVIRFIQGIFAAVAFTVAPMYVAEISDPKIRGF  
RPRC002688 474 KTVLLSVGPMCAITWLTAFTRNIVVLFIVRLIQGIAQGLVFTVAPIYIAEISSPNRRGT

RPRC015169 474 KISLLWIGPLTASLWILSLFTKNTVVLYIIRLLQGVMMAAIEETVVPVYLAEISGAERRGA  
RPRC002833 61 KGTLYLILAGCYIISWITLAVSTNIYVIYAGRIIGGIGVGGTFSCCPVFVAEITD DENRGM  
Rhopr-TRET 113 KKTILLTAIPFGISFILIAFASNVSMMAGRSLAGFCVGIASLALPVYLGEAIQPDVVRGT  
RPRC005613 94 RTTIIGIVIPSVVGMALMIWAVNPFMMVGRVILGLASGAYSVACPMYTNEISEVEIRGT

RPRC011385 534 LGGHFCVLLSSGTLFCHVIGSYLNYVTYLRILMVLVPGFFLLLLFMPETPYYYFMVVGKTA  
RPRC002688 534 LGGYFTVFWNLGLLYAYCTSYFLSYEHYILSLTFLPLIYFVTYLFPESPYLLEMAKNKG  
RPRC015169 534 LGGYYSVFWNLGLVGVYINSEYLSFDMYTLVSVIVVPIIFFTTFIFMPESPYFYLLMTNQLD  
RPRC002833 121 LGSVTOATMAIGFLMEYCIGPYTTIYFVLTITISVIPITIVFIALFYLIPESPYYLLIKNRKA  
Rhopr-TRET 173 LGLLPITAIAGNGGILICFLAGKYLDWSKLALFGACLPIPFILMFLIPETPRWFITGKKMEH  
RPRC005613 154 LGTYFQLQITIGILLSYVIGAVVYVYVWLSVICAIIPILTSVLMAFMPETPYYLLMKNQDVQ

RPRC011385 594 EAVKSYNWLKNDN-----GDLSKIEQAVQDEMASRGGWKDLIATKSDRKALLIVQSTICI  
RPRC002688 594 KAMASLAWLRHGE---DIEEECKKIEETVEEDMSNWGNWEDLVADKSDRRILLIVLIICV  
RPRC015169 594 DAKLSLOWLRHGE---DIKEEYEQIEEAVREDMKNAGSWKDLVATKKDRRSLIVLVVCL  
RPRC002833 181 EAIESLKWYRGADQLYSVQKELTSIEESVELR-KNKVGISGLWQR-GPKKALLISLYLLI  
Rhopr-TRET 233 KAKKSLWLRGEN--ADINKEMSELQKSTELFKENKSSIKELFNK-KYLCPFATSMGLMF  
RPRC005613 214 KAROSLQKLRGKK--YNIDGIEEQFQATIERVAAEKLSFRQAFITVAAKRGLAVGLGIMF

RPRC011385 648 AKCAIGLPTYISFGROMFQTLSSNQLLASDQLAIAMGVILTVSALISSLVSDMLGRRTL  
RPRC002688 651 SRYLIGMDAFVAYSKDTFTR--GTQGLISPDQLSVMGVVFAVTAFLASSFSDTVGRKRL  
RPRC015169 651 SRYLIGTAVFVIFAEDIFAK--AGOHMFTANQQAIGLALLFTISSAVASFFSDTVGRKRL  
RPRC002833 239 IQQSGNNAIISFAEYIFEM---GHIAVTGSMCAIIGGFTNLVGGIMTPFVVRKFSMKTS  
Rhopr-TRET 290 FQQLSGINAVIFYTVTIFKD---AGSTIDSNLSAIIIVGLVNLGATLVATALIDRVGRKVL  
RPRC005613 272 FQQLSGINAVIFYTSQIFQS---AGSKLAPSVATIIIVGAVSVVATYVSTLMVDRLGRKPL

RPRC011385 708 LIWTSLGAAVANLTIIVAVFYLYKEVSLNLAGTEWIMYLAVAFCTAANMGLAQQLVMVVOA  
RPRC002688 709 LLFSLSGTAISDLIIIVAVYFLDEKTSVSMKSDVWIMYIGVVALCIMS NVGLVQLMHTIKA  
RPRC015169 709 LIYSLIGTAISNIIIIIVYFCILELTSLOVTPYVWVMYIGIVGFCIFTSIGLGLMPTIKA  
RPRC002833 296 FLISAFGVAITLGLLALFYLQSSG-ADGAKVWFLPLAAYIILFNIFFCIGCGPLPWPMLIA  
Rhopr-TRET 347 MYFSNCIMAATLAILGTFYFMKNSG-TDMTQYGWIPLASSVIYVIGFSIGAGPIPWLMMG  
RPRC005613 329 LFIISDLVMAISSLVLGIFFWIQTHEPEKATSIGWLPICL SVFIIIVFSIGYGPWPMLIA

RPRC011385 768 EFFPSNTRGKGGAISGIVSAVVTFFIVLKLQVLTVAVGIYINYAIFSFALIT---AVVI  
RPRC002688 769 EFFPSHTRGRGSAVTSLSLTAALCTFLQLRLYTTITDMYGVYLNLFVIFAFATIS---AMFV  
RPRC015169 769 EFFPSHTRSKGGAITNLACSLAVFVQISMFPVISMVGMVFNFVIFSI VAVIG---CIFV  
RPRC002833 355 EMYPPIEVKSMASFVCGMFSCLEGFIVIEVTAEFLNLAGPTTV---FASLCLFITLITFGA  
Rhopr-TRET 406 EILPAKIRGSAGSMVTSFNWACTFLVTKTYVDLTLIGSHGAFWLFGGICLIS---LAFV  
RPRC005613 389 EIFSPAIKGPASSIACLFNWVCAFLVTLFPIVKDAIGSATTFWIFTVISFIG---TAFV

RPRC011385 825 YVILPESAGKILAEVNAIK-----  
RPRC002688 826 INYVTEPAGKSLAEI-----  
RPRC015169 826 IIFLPESAGKILHEV-----  
RPRC002833 412 VFLVPTTGLSLSEIHNYLATGKRPOKSE---  
Rhopr-TRET 463 IIFVPKTTGKSLQKI-----  
RPRC005613 446 YFEVPEKTKGKSLDEVVKIFGGSSSSSSDATIEASGEGLYFVEKSRLISYACIAVVYLYII

RPRC011385 -----  
RPRC002688 -----  
RPRC015169 -----  
RPRC002833 -----  
Rhopr-TRET -----  
RPRC005613 506 CFAVGAGAI PWLIGPELFNTAARPMASIGVLVNWFFNFIVGLTFLPIQLLIGPATFLIF

RPRC011385 -----  
RPRC002688 -----  
RPRC015169 -----  
RPRC002833 -----  
Rhopr-TRET -----

RPRC005613 566 IICQILALIFILAKVPETKGRPIEEITALFE
